# Supplementary material for: A Genome-Wide Characterization of MicroRNA Genes in Maize
Source: PLoS Genet. 2009 Nov 20;5(11):e1000716. doi: 10.1371/journal.pgen.1000716 (PMC2773440; doi:10.1371/journal.pgen.1000716)
Supplement: Table S8 — miRNA genes in maize and sorghum. (0.02 MB XLS) [file pgen.1000716.s008.xls]

## Sheet: Sheet1
Table S8: miRNA genes in maize and sorghum
	Maize		Sorghum
Family	Total Genes	Syntenic Genes	Total Genes	Syntenic Genes
miR156	12	12	9	9
miR159	11	8	3	3
miR160	7	6	6	5
miR162	1	1	1	1
miR164	8	6	5	5
miR166	12	11	12	9
miR167	10	10	9	8
miR168	2	2	1	1
miR169	15	14	20	17
miR171	14	13	11	10
miR172	3	3	6	2
miR319	4	4	2	2
miR390	2	2	2	1
miR393	3	3	2	2
miR394	2	2	2	1
miR395	16	16	16	10
miR396	7	7	5	4
miR397	2	1	1	1
miR398	2	2	1	1
miR399	10	8	14	10
miR408	1	1	1	1
miR482	1	0	0	0
miR528	2	2	1	1
miR529	1	1	2	1
miR827	1	0	1	0
miR1432	1	1	1	1
Total	150	136	134	106
